# Supplementary material for: Chondroitin sulfate-E mediates estrogen-induced osteoanabolism
Source: PubMed Central journal article supplement (PMC4355730; doi:10.1038/srep08994), 2015-03-11
Supplement: srep08994-s1.pdf [file srep08994-s1.pdf]

**Supplementary information**

**Chondroitin sulfate-E mediates estrogen-induced osteoanabolism.**

**Toshiyasu Koike<sup>1</sup>, Tadahisa Mikami<sup>1</sup>, Miharu Shida<sup>1</sup>, Osami Habuchi<sup>2</sup> & Hiroshi  
Kitagawa<sup>1\*</sup>**

<sup>1</sup>Department of Biochemistry, Kobe Pharmaceutical University, Higashinada-ku, Kobe  
658-8558, Japan. <sup>2</sup>Research Complex for the Medical Frontiers, Aichi Medical University,  
Nagakute, Aichi, 480-1195, Japan.

\*Correspondence and requests for materials should be addressed to H.K.  
([kitagawa@kobepharma-u.ac.jp](mailto:kitagawa@kobepharma-u.ac.jp)).

## Supplementary methods

**Flow cytometry.** The cultured BMSCs were detached by Accutase treatment, and washed with PBS containing 3% FBS and 0.1% NaN<sub>3</sub> (FACS buffer). The single cell suspensions (1.5 x 10<sup>4</sup> cells/test) were incubated with fluorescein isothiocyanate (FITC)-conjugated anti-mouse Sca-1 (stem cell antigen-1, eBioscience, 1:100), phycoerythrin (PE)-conjugated anti-mouse CD31 (eBioscience, 1:100), or PE-conjugated anti-mouse CD45 (eBioscience, 1:100) antibody for 1 h on ice. After washing with FACS buffer, cells were analyzed by BD Accuri™ C6 flow cytometer (BD Bioscience).

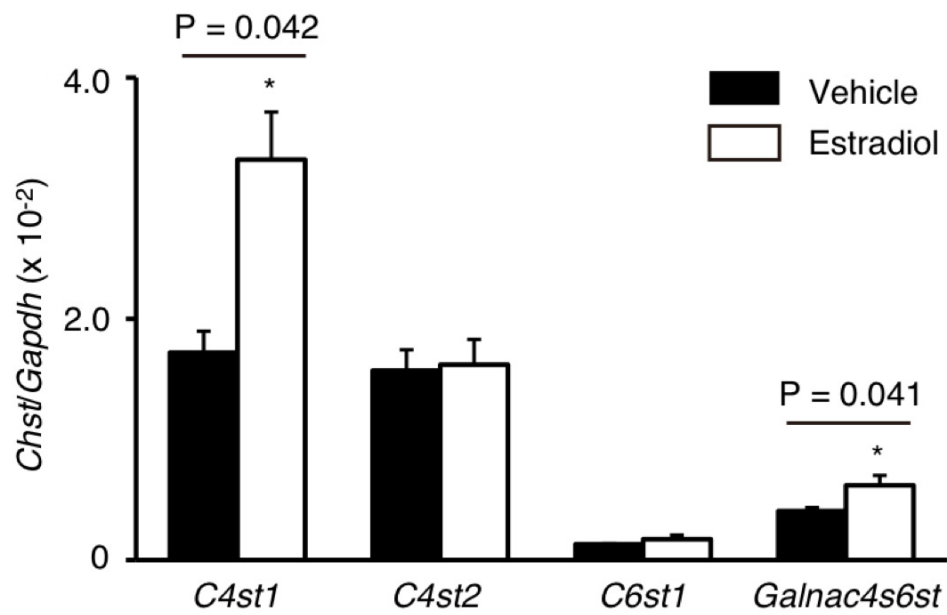

**Supplementary Figure S1 | Estradiol augments expression of CS-E-synthesizing enzymes in BMSCs.** Expression of mRNAs encoding CHSTs (*C4st1*, *C4st2*, *C6st1*, or *Galnac4s6st*) in BMSCs isolated from 14-week-old WT female mice. (n = 3 cultures, each from an independent mouse). Data are represented as mean ± s.d. \*, P < 0.05.

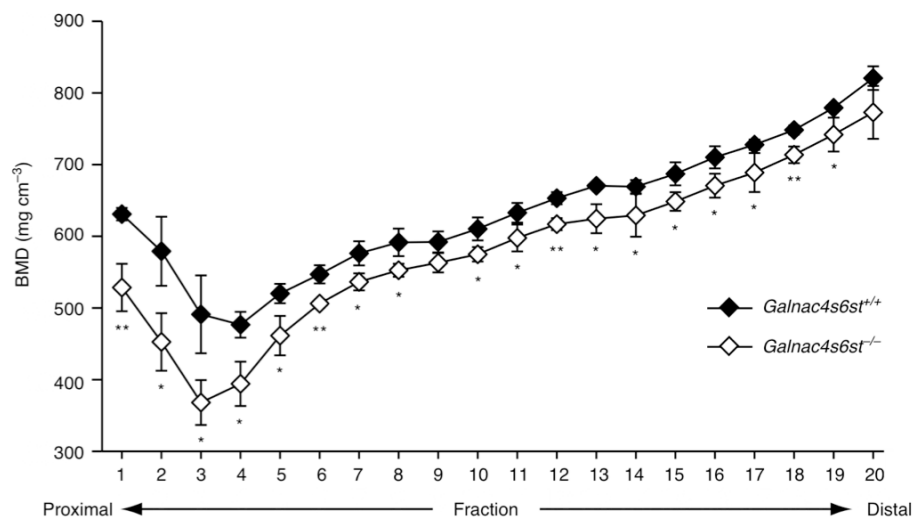

**Supplementary Figure S2 | Bone mass in tibias of *Galnac4s6st*<sup>-/-</sup> mice.** BMD of each of 20 equal longitudinal divisions of tibias from *Galnac4s6st*<sup>+/+</sup> or *Galnac4s6st*<sup>-/-</sup> mice (n = 3 bones total, each from different litters). Data are represented as mean ± s.d. \*, P < 0.05; \*\*, P < 0.01.

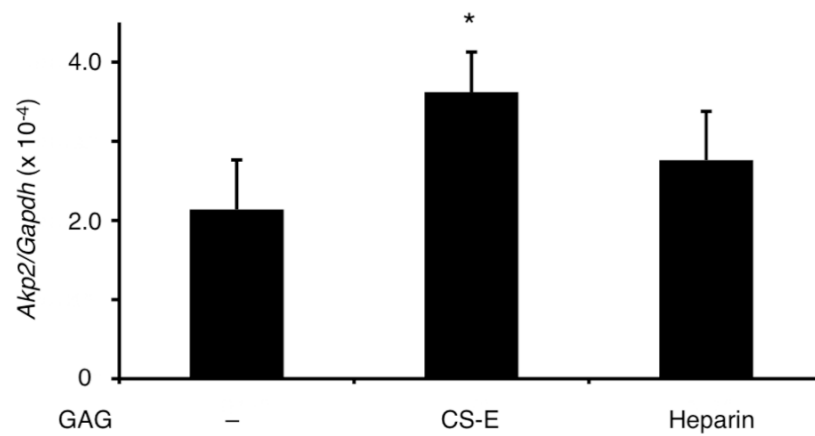

**Supplementary Figure S3 | Exogenous CS-E, but not heparin, induces ALP expression in the low-density MC3T3-E1 cultures.** Expression of *Akp2* mRNA in the low density MC3T3-E1 cultures in GM for 24 h in the presence or absence of GAGs (CS-E or heparin, 20  $\mu$ g/ml each) (n = 3 independent experiments). Data are represented as mean  $\pm$  s.d. \*, P < 0.05, Dunnett's test.

(a)

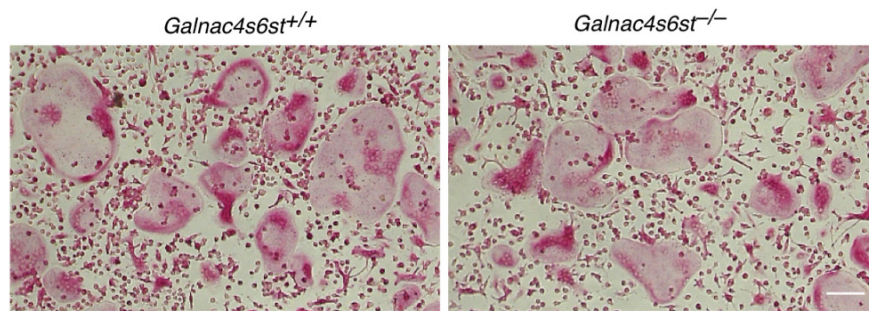

(b)

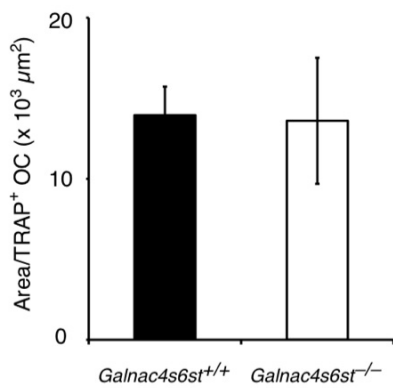

(c)

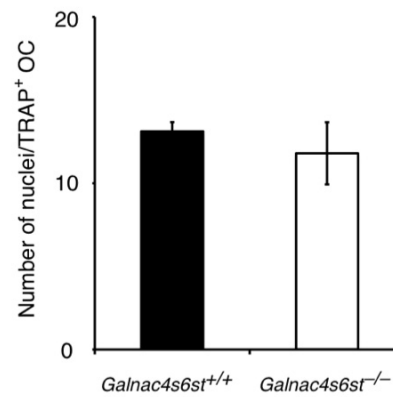

**Supplementary Figure S4 | Osteoclast fusion is apparently normal in *in vitro* cultures of BMMs derived from *Galnac4s6st*<sup>-/-</sup> mice.** BMMs derived from *Galnac4s6st*<sup>+/+</sup> or *Galnac4s6st*<sup>-/-</sup> mice were cultured for 72-h in DM supplemented with RANKL to facilitate osteoclastogenesis. TRAP-stained osteoclastic cells (OCs) (a), mean area per OC (b), and the number of nuclei per OC (c) are shown as indications of osteoclastogenesis (n = 3 cultures, each from different litters). Data are represented as mean ± s.d. Scale bar in a, 100 μm.

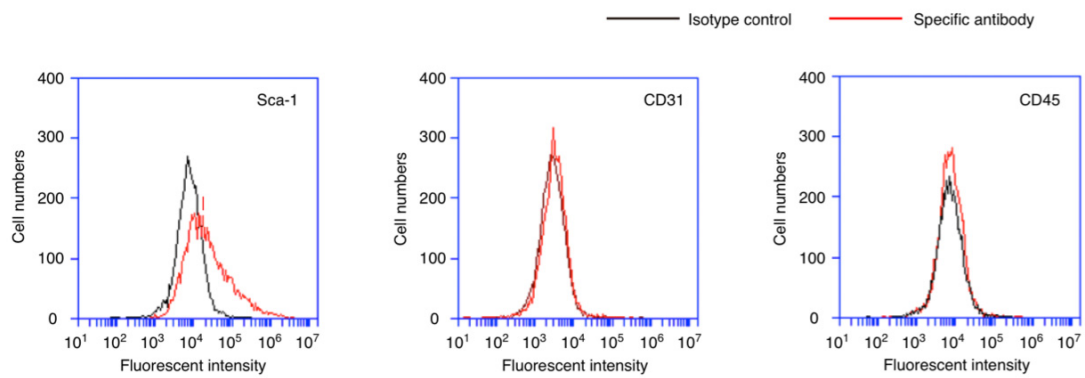

**Supplementary Figure S5 | Immunophenotypic characteristics of BMSCs used in this study.** The isolated WT BMSCs were labeled with FITC-conjugated anti-Sca-1 (a mesenchymal stem cell marker), PE-conjugated anti-CD31 (an endothelial cell marker), or PE-conjugated anti-CD45 (a hematopoietic marker) antibody. Flow cytometric analysis showed that the cultured cells were positive for a typical mesenchymal stem cell marker, but negative for endothelial and hematopoietic markers.
